# Supplementary material for: Validity and reliability of knowledge, attitude, and practice regarding exercise and exergames experiences questionnaire among high school students
Source: BMC Public Health. 2022 Sep 14;22:1743. doi: 10.1186/s12889-022-14147-z (PMC9472413; doi:10.1186/s12889-022-14147-z)
Supplement: Supplementary file 1 — Additional file 1. [file 12889_2022_14147_MOESM1_ESM.xlsx]

## Sheet: Sheet1
Exercise is necessary to maintain good health.	Exercise does more harm than good.	Household chores such as dishwashing is an exercise good e2ugh to maintain health.	Exercise can be aerobic or anaerobic.	Aerobic exercise include jogging, swimming, biking, running, brisk walking.	Exercise should be done continually throughout life for good health.	Regular exercise increasing and maintaining flexibility.	Regular exercise increasing and maintaining muscular strength and endurance.	Regular exercise maintaining a 2rmal blood pressure range.	I feel that my regular work is an adequate substitute to regular exercise.	I need someone to keep reminding me to exercise.	I use little soreness from previous exercises or being tired as an excuse to keep away yourself from further exercises exercising more.	I feel that exercise takes away most of my energy.	I look forward to exercising each day.	Even without company, I exercise regularly.	I feel that I have 2 time of my own and daily exercises Take away my valuable time.	I give up on exercising owing to a difficulty of sticking to a schedule.	I should exercise regularly for my health.	Doing regular exercise is good for my fitness and health.	Do you walk for at least 10 minutes continuously to get to and from places?	In a typical week, on how many days do you walk for at least 10 minutes continuously to get to and from places?	How much time do you spend walking on a typical day?	Do you do any vigorous intensity sports, fitness or recreational (leisure) activities that cause large increases in breathing or heart rate like (running or football), for at least 10 minutes continuously?	In a typical week, on how many days do you do vigorous-intensity sports, fitness or recreational (leisure) activities?	How much time do you spend doing vigorous-intensity sports, fitness or recreational activities on a typical day?	Do you do any moderate-intensity sports, fitness or recreational (leisure) activity that causes a small increase in breathing or heart rate such as (brisk walking, cycling, swimming, volleyball) for at least 10 minutes continuously?	In a typical week, on how many days do you engage in moderate-intensity sports, fitness or recreational (leisure) activities?	How much time do you spend doing moderate-intensity sports, fitness? Or recreational (leisure) activities on a typical day.	Did you k2w what is exergames? Such as Xbox 360 and Nintendo Wii	Did you try to play with exergames?	Did you think that exergames is more fun than 2rmal exercise?	Have you seen anyone played exergames?	Has anyone suggested you to use exergames?
Netural	Netural	Netural	Netural	Netural	Netural	Netural	Netural	Netural	Neither agree nor disagree	disagree	strongly disagree	strongly disagree	strongly disagree	strongly disagree	strongly disagree	strongly disagree	strongly disagree	strongly disagree	no	7	7	no	7	7	no	7	7	yes	yes	yes	yes	yes
Agree	Agree	Agree	Agree	Agree	Agree	Agree	Agree	Agree	strongly agree	agree	strongly agree	agree	agree	agree	agree	strongly disagree	agree	agree	yes	4	10	no	7	60	no	7	180	no	no	yes	no	no
Agree	Agree	Netural	Netural	Netural	Netural	Netural	Netural	Agree	Neither agree nor disagree	agree	Neither agree nor disagree	disagree	agree	agree	disagree	disagree	agree	agree	yes	2	15	yes	3	15	yes	1	10	no	yes	yes	no	no
Agree	Disagree	Disagree	Agree	Agree	Agree	Agree	Agree	Agree	Neither agree nor disagree	agree	Neither agree nor disagree	disagree	agree	agree	Neither agree nor disagree	Neither agree nor disagree	strongly agree	strongly agree	yes	3	10	yes	4	60	yes	4	30	yes	yes	no	yes	no
Agree	Agree	Agree	Agree	Agree	Agree	Agree	Agree	Agree	agree	Neither agree nor disagree	Neither agree nor disagree	agree	strongly agree	strongly agree	disagree	Neither agree nor disagree	strongly agree	strongly agree	yes	1	60	yes	3	20	no	3	10	no	no	no	no	no
Agree	Netural	Netural	Netural	Netural	Agree	Agree	Agree	Netural	Neither agree nor disagree	agree	Neither agree nor disagree	disagree	agree	Neither agree nor disagree	Neither agree nor disagree	Neither agree nor disagree	agree	agree	yes	3	57	yes	2	40	no	2	44	yes	yes	no	yes	yes
Agree	Disagree	Netural	Agree	Agree	Agree	Agree	Agree	Disagree	agree	strongly agree	strongly disagree	strongly agree	strongly agree	Neither agree nor disagree	strongly disagree	Neither agree nor disagree	strongly agree	strongly agree	yes	5	57	yes	3	40	yes	2	90	yes	yes	no	yes	no
Agree	Agree	Agree	Agree	Netural	Agree	Agree	Agree	Agree	agree	strongly agree	strongly agree	strongly agree	Neither agree nor disagree	Neither agree nor disagree	Neither agree nor disagree	Neither agree nor disagree	strongly agree	agree	yes	4	15	no	1	30	yes	1	44	no	yes	yes	no	yes
Agree	Agree	Agree	Agree	Agree	Agree	Agree	Agree	Agree	agree	strongly agree	agree	disagree	Neither agree nor disagree	Neither agree nor disagree	strongly agree	strongly agree	strongly agree	strongly agree	yes	7	24	no	0	40	yes	7	44	no	no	no	no	no
Agree	Disagree	Netural	Agree	Agree	Agree	Agree	Agree	Agree	Neither agree nor disagree	agree	agree	Neither agree nor disagree	agree	Neither agree nor disagree	strongly agree	strongly agree	strongly agree	strongly agree	yes	7	57	yes	1	40	yes	0	44	yes	no	yes	yes	yes
Agree	Netural	Agree	Disagree	Disagree	Netural	Agree	Disagree	Agree	Neither agree nor disagree	disagree	strongly agree	agree	strongly disagree	disagree	Neither agree nor disagree	agree	strongly disagree	Neither agree nor disagree	yes	1	4	yes	4	2	no	3	3	no	yes	yes	yes	yes
Agree	Agree	Netural	Netural	Netural	Netural	Netural	Netural	Netural	strongly disagree	Neither agree nor disagree	disagree	agree	disagree	agree	disagree	Neither agree nor disagree	Neither agree nor disagree	Neither agree nor disagree	yes	1	0	yes	2	0	yes	3	44	yes	yes	yes	yes	yes
Agree	Disagree	Disagree	Agree	Netural	Agree	Netural	Agree	Agree	disagree	disagree	disagree	agree	disagree	disagree	agree	agree	strongly agree	strongly agree	no	4	20	no	1	30	yes	3	40	no	no	no	no	no
Agree	Disagree	Netural	Agree	Agree	Agree	Agree	Agree	Agree	agree	agree	agree	agree	Neither agree nor disagree	agree	agree	agree	agree	strongly agree	yes	3	57	no	0	0	yes	3	44	yes	no	yes	yes	no
Agree	Netural	Agree	Agree	Agree	Agree	Agree	Agree	Agree	agree	Neither agree nor disagree	agree	Neither agree nor disagree	agree	agree	Neither agree nor disagree	Neither agree nor disagree	agree	strongly agree	yes	7	50	yes	3	30	yes	2	40	yes	yes	yes	yes	yes
Disagree	Disagree	Netural	Netural	Agree	Disagree	Agree	Netural	Disagree	disagree	disagree	disagree	strongly agree	strongly disagree	disagree	disagree	agree	disagree	disagree	yes	3	70	no	3	70	yes	2	183	yes	no	no	no	no
Agree	Disagree	Netural	Agree	Netural	Netural	Agree	Agree	Agree	agree	strongly agree	Neither agree nor disagree	agree	Neither agree nor disagree	disagree	disagree	disagree	Neither agree nor disagree	Neither agree nor disagree	yes	2	120	no	2	2	yes	1	2	no	no	yes	no	no
Agree	Disagree	Agree	Agree	Agree	Agree	Agree	Agree	Agree	strongly agree	Neither agree nor disagree	strongly agree	strongly disagree	disagree	disagree	disagree	Neither agree nor disagree	strongly agree	strongly agree	yes	5	30	yes	1	2	no	1	1	no	no	no	no	no
Agree	Disagree	Netural	Agree	Netural	Agree	Netural	Agree	Agree	Neither agree nor disagree	Neither agree nor disagree	disagree	agree	agree	strongly agree	disagree	agree	agree	strongly agree	yes	4	30	yes	3	45	yes	3	30	no	no	no	no	no
Netural	Netural	Netural	Netural	Agree	Agree	Agree	Netural	Netural	disagree	agree	strongly disagree	disagree	strongly agree	disagree	strongly agree	strongly agree	strongly agree	strongly agree	yes	7	10	no	0	0	no	0	120	no	no	no	no	no
Agree	Disagree	Netural	Agree	Netural	Netural	Agree	Agree	Netural	Neither agree nor disagree	agree	agree	disagree	agree	Neither agree nor disagree	disagree	Neither agree nor disagree	strongly agree	strongly agree	yes	4	30	yes	3	45	yes	2	45	yes	no	yes	no	yes
Agree	Agree	Agree	Agree	Agree	Netural	Agree	Agree	Agree	strongly agree	agree	agree	strongly agree	strongly agree	strongly agree	strongly agree	strongly agree	strongly agree	agree	yes	3	30	yes	3	3	yes	3	30	yes	yes	no	yes	yes
Agree	Netural	Netural	Netural	Netural	Agree	Agree	Agree	Agree	Neither agree nor disagree	Neither agree nor disagree	Neither agree nor disagree	disagree	agree	agree	disagree	disagree	agree	agree	yes	2	10	no	0	0	no	0	0	yes	no	yes	no	no
Agree	Disagree	Netural	Agree	Netural	Netural	Agree	Agree	Netural	Neither agree nor disagree	agree	Neither agree nor disagree	disagree	Neither agree nor disagree	Neither agree nor disagree	agree	Neither agree nor disagree	strongly agree	strongly agree	yes	3	57	no	2	40	no	2	44	no	no	yes	no	no
Agree	Disagree	Agree	Agree	Agree	Agree	Agree	Agree	Agree	agree	agree	disagree	disagree	agree	Neither agree nor disagree	disagree	Neither agree nor disagree	agree	agree	yes	5	120	yes	2	120	yes	3	120	yes	yes	yes	yes	yes
Netural	Disagree	Netural	Agree	Agree	Agree	Netural	Netural	Agree	agree	agree	Neither agree nor disagree	disagree	agree	agree	Neither agree nor disagree	disagree	Neither agree nor disagree	agree	yes	3	60	yes	2	60	yes	2	60	yes	yes	yes	yes	yes
Agree	Agree	Agree	Agree	Agree	Agree	Agree	Agree	Agree	Neither agree nor disagree	strongly agree	Neither agree nor disagree	Neither agree nor disagree	agree	agree	agree	agree	agree	agree	yes	1	30	no	3	60	yes	1	10	yes	yes	yes	yes	yes
Agree	Agree	Agree	Agree	Agree	Agree	Agree	Agree	Agree	agree	agree	agree	agree	agree	agree	agree	agree	agree	agree	yes	2	5	yes	1	1	yes	1	1	no	yes	no	no	no
Agree	Disagree	Netural	Agree	Agree	Agree	Agree	Agree	Agree	agree	agree	disagree	disagree	agree	agree	Neither agree nor disagree	disagree	agree	agree	yes	5	10	yes	5	30	no	5	30	yes	no	no	no	no
Netural	Netural	Netural	Netural	Netural	Netural	Netural	Netural	Netural	Neither agree nor disagree	Neither agree nor disagree	agree	disagree	Neither agree nor disagree	agree	Neither agree nor disagree	Neither agree nor disagree	strongly agree	strongly agree	no	1	60	yes	2	30	yes	4	40	no	no	yes	no	no
Agree	Disagree	Agree	Agree	Netural	Agree	Agree	Agree	Agree	agree	strongly agree	Neither agree nor disagree	strongly disagree	strongly agree	strongly agree	strongly disagree	strongly disagree	strongly agree	strongly agree	yes	4	15	yes	3	30	yes	4	30	yes	yes	yes	yes	yes
Agree	Netural	Netural	Agree	Agree	Agree	Agree	Agree	Agree	agree	disagree	Neither agree nor disagree	disagree	strongly agree	agree	agree	disagree	strongly agree	strongly agree	yes	5	60	yes	3	90	yes	3	60	no	yes	no	no	no
Agree	Agree	Agree	Agree	Agree	Agree	Agree	Agree	Agree	strongly agree	agree	strongly agree	strongly agree	Neither agree nor disagree	agree	strongly agree	strongly agree	strongly agree	strongly agree	yes	1	57	yes	1	40	yes	3	44	yes	yes	no	no	yes
Agree	Agree	Netural	Agree	Agree	Netural	Netural	Netural	Netural	agree	Neither agree nor disagree	Neither agree nor disagree	Neither agree nor disagree	agree	agree	agree	disagree	Neither agree nor disagree	Neither agree nor disagree	yes	1	343	no	2	34	no	3	434	no	yes	yes	yes	yes
Agree	Disagree	Agree	Agree	Disagree	Agree	Agree	Agree	Agree	agree	strongly agree	agree	strongly disagree	strongly agree	strongly agree	strongly disagree	strongly disagree	strongly agree	strongly agree	yes	3	45	yes	3	45	yes	3	45	no	no	no	yes	yes
Netural	Disagree	Netural	Agree	Agree	Disagree	Disagree	Netural	Disagree	strongly disagree	Neither agree nor disagree	strongly agree	agree	agree	strongly disagree	disagree	disagree	Neither agree nor disagree	Neither agree nor disagree	yes	1	30	yes	2	30	yes	3	30	yes	no	yes	yes	no
Disagree	Netural	Agree	Disagree	Disagree	Netural	Agree	Agree	Disagree	strongly disagree	Neither agree nor disagree	agree	disagree	strongly agree	strongly disagree	strongly disagree	Neither agree nor disagree	strongly agree	strongly disagree	yes	1	30	yes	2	30	yes	3	30	yes	yes	no	no	yes
Disagree	Netural	Agree	Disagree	Disagree	Netural	Agree	Agree	Disagree	strongly disagree	Neither agree nor disagree	agree	disagree	strongly agree	strongly disagree	strongly disagree	Neither agree nor disagree	strongly agree	strongly disagree	yes	2	30	yes	2	30	yes	3	30	yes	yes	no	no	yes
Agree	Disagree	Netural	Agree	Agree	Netural	Agree	Agree	Netural	agree	agree	Neither agree nor disagree	Neither agree nor disagree	agree	Neither agree nor disagree	Neither agree nor disagree	Neither agree nor disagree	strongly agree	agree	yes	3	30	yes	2	20	yes	1	10	yes	yes	yes	yes	yes
Agree	Disagree	Netural	Agree	Agree	Agree	Agree	Agree	Agree	Neither agree nor disagree	strongly agree	agree	disagree	Neither agree nor disagree	Neither agree nor disagree	disagree	Neither agree nor disagree	strongly agree	strongly agree	yes	4	60	no	2	30	yes	5	60	no	no	no	no	no
Agree	Netural	Netural	Agree	Netural	Netural	Disagree	Netural	Agree	strongly agree	Neither agree nor disagree	strongly disagree	disagree	Neither agree nor disagree	Neither agree nor disagree	agree	Neither agree nor disagree	agree	strongly agree	yes	3	30	yes	2	10	yes	2	15	no	no	no	yes	yes
Agree	Disagree	Netural	Agree	Agree	Agree	Agree	Agree	Agree	agree	strongly disagree	Neither agree nor disagree	disagree	strongly agree	strongly agree	disagree	disagree	strongly agree	strongly agree	yes	7	25	yes	3	45	yes	3	30	no	no	no	no	no
Agree	Netural	Disagree	Netural	Agree	Netural	Agree	Agree	Agree	disagree	disagree	strongly agree	disagree	disagree	Neither agree nor disagree	strongly agree	Neither agree nor disagree	Neither agree nor disagree	strongly agree	no	2	3	no	0	0	no	2	3	no	yes	yes	yes	yes
Agree	Netural	Netural	Netural	Netural	Netural	Netural	Netural	Disagree	disagree	Neither agree nor disagree	Neither agree nor disagree	Neither agree nor disagree	agree	Neither agree nor disagree	Neither agree nor disagree	disagree	Neither agree nor disagree	disagree	no	1	240	no	0	0	no	0	2	yes	yes	no	yes	yes
Agree	Disagree	Netural	Netural	Netural	Agree	Agree	Agree	Agree	Neither agree nor disagree	agree	disagree	strongly disagree	strongly agree	agree	strongly disagree	strongly disagree	strongly agree	strongly agree	yes	4	360	yes	3	60	no	1	44	yes	yes	yes	yes	yes
Agree	Disagree	Agree	Netural	Agree	Disagree	Agree	Agree	Agree	disagree	strongly disagree	agree	strongly disagree	agree	disagree	disagree	Neither agree nor disagree	strongly agree	strongly agree	yes	3	2	no	3	7	yes	2	5	no	no	no	no	no
Agree	Agree	Disagree	Netural	Netural	Netural	Agree	Disagree	Agree	Neither agree nor disagree	Neither agree nor disagree	agree	agree	Neither agree nor disagree	disagree	strongly disagree	agree	strongly agree	disagree	yes	2	120	yes	4	3	no	4	60	no	no	yes	no	no
Agree	Disagree	Agree	Agree	Agree	Agree	Netural	Netural	Agree	agree	agree	Neither agree nor disagree	disagree	Neither agree nor disagree	Neither agree nor disagree	disagree	Neither agree nor disagree	strongly agree	agree	yes	3	15	yes	2	30	yes	1	5	no	yes	yes	no	no
Agree	Disagree	Agree	Agree	Agree	Agree	Agree	Agree	Agree	strongly agree	agree	Neither agree nor disagree	strongly disagree	strongly agree	strongly agree	strongly disagree	strongly disagree	strongly agree	strongly agree	yes	5	120	yes	5	30	yes	5	30	yes	yes	yes	no	no
Agree	Disagree	Netural	Agree	Agree	Agree	Agree	Agree	Agree	disagree	strongly agree	strongly agree	agree	Neither agree nor disagree	Neither agree nor disagree	strongly agree	strongly agree	strongly agree	strongly agree	yes	7	30	no	0	0	yes	7	30	no	no	yes	no	no
Agree	Agree	Agree	Netural	Netural	Agree	Netural	Netural	Agree	agree	strongly agree	Neither agree nor disagree	strongly agree	agree	agree	disagree	disagree	strongly agree	strongly agree	no	2	57	no	1	60	no	1	60	yes	yes	no	yes	no
Agree	Agree	Agree	Agree	Agree	Agree	Agree	Agree	Agree	agree	Neither agree nor disagree	Neither agree nor disagree	agree	strongly agree	agree	Neither agree nor disagree	agree	agree	strongly agree	yes	5	300	yes	2	300	yes	3	150	no	no	yes	no	no
Agree	Disagree	Agree	Agree	Agree	Agree	Agree	Agree	Agree	strongly agree	disagree	strongly disagree	agree	strongly agree	strongly agree	disagree	disagree	strongly agree	strongly agree	yes	7	57	yes	7	40	yes	7	44	yes	no	yes	no	no
Agree	Agree	Agree	Agree	Netural	Agree	Agree	Agree	Agree	agree	disagree	agree	strongly disagree	Neither agree nor disagree	disagree	strongly disagree	disagree	strongly agree	agree	yes	1	57	yes	0	40	no	0	44	no	no	yes	no	no
Agree	Disagree	Netural	Agree	Agree	Agree	Disagree	Agree	Netural	agree	strongly disagree	strongly disagree	strongly disagree	Neither agree nor disagree	agree	strongly disagree	strongly disagree	strongly agree	strongly agree	no	2	15	no	7	40	yes	7	30	yes	no	no	yes	no
Agree	Agree	Agree	Agree	Agree	Agree	Agree	Agree	Agree	strongly agree	strongly agree	strongly agree	agree	strongly agree	strongly agree	strongly agree	strongly agree	strongly agree	agree	yes	7	10	yes	7	2	yes	7	2	no	yes	yes	yes	yes
Agree	Agree	Agree	Netural	Agree	Netural	Netural	Agree	Agree	agree	strongly disagree	agree	strongly agree	agree	Neither agree nor disagree	agree	agree	strongly agree	strongly agree	yes	2	60	yes	4	60	yes	2	60	yes	yes	yes	no	yes
Agree	Agree	Agree	Agree	Agree	Agree	Agree	Agree	Agree	agree	strongly agree	agree	agree	agree	Neither agree nor disagree	strongly disagree	strongly disagree	strongly agree	strongly agree	yes	4	40	yes	4	60	yes	4	30	no	no	yes	no	no
Agree	Disagree	Agree	Agree	Agree	Agree	Agree	Agree	Agree	strongly disagree	strongly agree	Neither agree nor disagree	strongly agree	strongly agree	strongly disagree	strongly agree	strongly agree	strongly agree	strongly agree	yes	0	50	yes	0	0	yes	0	0	yes	yes	yes	no	yes
Agree	Disagree	Agree	Agree	Agree	Agree	Agree	Agree	Agree	Neither agree nor disagree	strongly agree	disagree	strongly agree	strongly agree	strongly agree	strongly agree	strongly agree	strongly agree	strongly agree	yes	4	30	no	3	10	yes	4	30	yes	yes	yes	yes	yes
Agree	Netural	Netural	Agree	Netural	Netural	Netural	Netural	Agree	Neither agree nor disagree	strongly agree	agree	strongly agree	agree	Neither agree nor disagree	Neither agree nor disagree	Neither agree nor disagree	strongly agree	strongly agree	yes	4	15	no	2	15	yes	4	15	no	no	yes	no	no
Agree	Disagree	Netural	Agree	Agree	Agree	Agree	Agree	Agree	Neither agree nor disagree	agree	Neither agree nor disagree	disagree	agree	disagree	disagree	Neither agree nor disagree	strongly agree	strongly agree	no	2	9	no	1	9	no	2	8	yes	yes	yes	yes	yes
Agree	Disagree	Netural	Agree	Agree	Agree	Agree	Agree	Agree	Neither agree nor disagree	disagree	disagree	disagree	disagree	Neither agree nor disagree	disagree	Neither agree nor disagree	agree	agree	no	6	30	yes	0	0	yes	7	15	yes	no	yes	no	no
Agree	Disagree	Netural	Netural	Netural	Netural	Agree	Agree	Netural	Neither agree nor disagree	agree	disagree	disagree	agree	Neither agree nor disagree	disagree	Neither agree nor disagree	strongly agree	strongly agree	yes	7	57	no	1	360	no	1	120	yes	no	no	yes	yes
Netural	Disagree	Agree	Agree	Agree	Agree	Agree	Agree	Agree	Neither agree nor disagree	strongly agree	Neither agree nor disagree	agree	agree	disagree	agree	strongly agree	strongly agree	strongly agree	yes	2	1	yes	2	30	yes	3	20	no	no	no	no	no
Agree	Disagree	Netural	Agree	Agree	Agree	Netural	Netural	Netural	Neither agree nor disagree	agree	disagree	Neither agree nor disagree	agree	agree	Neither agree nor disagree	Neither agree nor disagree	strongly agree	agree	yes	4	30	no	3	30	yes	2	30	yes	no	no	yes	no
Agree	Agree	Netural	Agree	Agree	Agree	Agree	Agree	Agree	disagree	strongly disagree	strongly disagree	disagree	strongly agree	strongly agree	disagree	disagree	strongly agree	strongly agree	yes	6	57	yes	3	90	yes	4	30	yes	yes	no	yes	yes
Agree	Disagree	Netural	Agree	Agree	Agree	Agree	Agree	Agree	disagree	Neither agree nor disagree	disagree	Neither agree nor disagree	Neither agree nor disagree	agree	disagree	agree	strongly agree	strongly agree	no	5	120	yes	1	30	no	0	30	yes	no	no	yes	no
Agree	Disagree	Netural	Agree	Agree	Agree	Agree	Agree	Agree	Neither agree nor disagree	agree	Neither agree nor disagree	Neither agree nor disagree	disagree	disagree	agree	disagree	strongly agree	strongly agree	yes	2	57	yes	1	40	yes	1	44	yes	no	yes	no	no
Agree	Agree	Netural	Agree	Agree	Agree	Agree	Agree	Agree	disagree	strongly disagree	strongly disagree	disagree	strongly agree	strongly agree	disagree	disagree	strongly agree	strongly agree	yes	6	57	yes	3	90	yes	4	90	yes	yes	no	yes	yes
Agree	Disagree	Netural	Agree	Agree	Agree	Agree	Agree	Agree	agree	agree	strongly disagree	strongly disagree	strongly agree	agree	strongly disagree	strongly disagree	strongly agree	strongly agree	yes	4	60	yes	3	30	yes	2	30	yes	yes	no	yes	no
Netural	Disagree	Agree	Agree	Agree	Netural	Disagree	Disagree	Agree	strongly agree	agree	disagree	agree	disagree	agree	strongly agree	strongly agree	agree	strongly agree	yes	6	30	yes	2	60	yes	2	45	no	no	no	no	no
Agree	Disagree	Netural	Agree	Agree	Agree	Agree	Agree	Agree	agree	agree	strongly disagree	strongly disagree	strongly agree	agree	strongly disagree	strongly disagree	strongly agree	strongly agree	yes	4	60	yes	3	30	yes	2	30	yes	yes	no	yes	no
Agree	Netural	Netural	Netural	Agree	Agree	Agree	Agree	Agree	agree	disagree	disagree	strongly disagree	Neither agree nor disagree	Neither agree nor disagree	disagree	disagree	agree	strongly agree	yes	7	10	no	3	10	no	3	10	no	no	no	no	no
Agree	Disagree	Netural	Netural	Netural	Netural	Agree	Agree	Netural	Neither agree nor disagree	agree	disagree	disagree	agree	Neither agree nor disagree	disagree	Neither agree nor disagree	strongly agree	strongly agree	yes	7	57	no	1	360	no	1	120	yes	no	no	yes	yes
Agree	Disagree	Netural	Agree	Netural	Agree	Agree	Agree	Agree	Neither agree nor disagree	disagree	disagree	strongly disagree	agree	agree	disagree	disagree	strongly agree	strongly agree	yes	2	60	yes	2	1	yes	1	30	yes	yes	yes	yes	no
Agree	Netural	Netural	Agree	Agree	Agree	Agree	Agree	Agree	Neither agree nor disagree	Neither agree nor disagree	agree	Neither agree nor disagree	agree	agree	Neither agree nor disagree	disagree	agree	agree	yes	2	3	no	0	0	yes	7	2	no	no	no	no	no
Agree	Disagree	Agree	Agree	Disagree	Agree	Agree	Agree	Agree	Neither agree nor disagree	agree	agree	Neither agree nor disagree	Neither agree nor disagree	agree	Neither agree nor disagree	Neither agree nor disagree	strongly agree	strongly agree	yes	6	360	no	0	0	no	0	44	yes	yes	yes	yes	yes
Agree	Netural	Agree	Agree	Agree	Agree	Agree	Agree	Netural	agree	Neither agree nor disagree	strongly disagree	Neither agree nor disagree	Neither agree nor disagree	strongly agree	strongly disagree	Neither agree nor disagree	strongly agree	strongly agree	yes	4	20	yes	3	120	yes	4	30	yes	yes	yes	yes	yes
Agree	Disagree	Agree	Agree	Agree	Agree	Netural	Agree	Agree	Neither agree nor disagree	strongly agree	disagree	disagree	Neither agree nor disagree	Neither agree nor disagree	Neither agree nor disagree	disagree	disagree	agree	yes	2	30	no	1	30	yes	1	30	no	no	yes	no	no
Agree	Netural	Netural	Netural	Agree	Agree	Agree	Agree	Agree	strongly agree	strongly agree	agree	Neither agree nor disagree	agree	strongly agree	Neither agree nor disagree	Neither agree nor disagree	strongly agree	strongly agree	yes	7	60	yes	3	60	yes	2	30	no	yes	yes	yes	yes
Disagree	Netural	Agree	Netural	Disagree	Disagree	Netural	Netural	Netural	strongly agree	strongly agree	Neither agree nor disagree	strongly disagree	Neither agree nor disagree	strongly agree	strongly agree	strongly agree	disagree	agree	yes	7	57	yes	2	150	yes	2	44	no	no	yes	no	no
Agree	Disagree	Netural	Agree	Netural	Agree	Agree	Agree	Netural	strongly agree	Neither agree nor disagree	disagree	strongly disagree	agree	strongly agree	strongly disagree	Neither agree nor disagree	strongly agree	strongly agree	yes	5	120	yes	4	150	no	6	300	no	no	no	no	no
Agree	Disagree	Disagree	Agree	Disagree	Agree	Agree	Agree	Agree	disagree	disagree	disagree	strongly disagree	strongly agree	agree	strongly disagree	disagree	strongly agree	strongly agree	yes	5	30	no	3	30	yes	4	30	no	no	no	no	no
Agree	Agree	Agree	Agree	Agree	Agree	Agree	Agree	Agree	strongly agree	agree	agree	agree	strongly agree	strongly agree	strongly agree	strongly agree	agree	agree	yes	7	180	yes	3	40	yes	2	20	yes	yes	no	yes	yes
Agree	Disagree	Disagree	Netural	Agree	Agree	Agree	Agree	Agree	Neither agree nor disagree	agree	Neither agree nor disagree	strongly disagree	disagree	Neither agree nor disagree	strongly disagree	disagree	strongly agree	strongly agree	no	3	60	yes	5	30	yes	4	90	no	yes	yes	yes	no
Agree	Agree	Netural	Netural	Netural	Agree	Agree	Agree	Agree	Neither agree nor disagree	Neither agree nor disagree	Neither agree nor disagree	Neither agree nor disagree	Neither agree nor disagree	Neither agree nor disagree	Neither agree nor disagree	Neither agree nor disagree	Neither agree nor disagree	Neither agree nor disagree	no	3	30	no	0	0	yes	3	30	no	no	yes	no	no
Agree	Disagree	Netural	Agree	Agree	Agree	Agree	Agree	Agree	disagree	Neither agree nor disagree	agree	Neither agree nor disagree	disagree	disagree	Neither agree nor disagree	Neither agree nor disagree	agree	agree	yes	5	30	no	5	30	yes	5	30	yes	yes	yes	yes	yes
Agree	Netural	Disagree	Netural	Agree	Netural	Agree	Agree	Netural	strongly agree	strongly agree	strongly agree	strongly agree	agree	strongly agree	Neither agree nor disagree	agree	agree	agree	yes	1	120	yes	3	10	yes	5	120	no	no	no	no	no
Agree	Disagree	Netural	Agree	Agree	Netural	Agree	Agree	Agree	Neither agree nor disagree	agree	Neither agree nor disagree	disagree	Neither agree nor disagree	Neither agree nor disagree	disagree	Neither agree nor disagree	agree	strongly agree	yes	1	10	yes	1	1	yes	1	10	yes	yes	yes	yes	yes
Agree	Disagree	Netural	Netural	Agree	Agree	Agree	Agree	Agree	Neither agree nor disagree	strongly disagree	disagree	strongly disagree	agree	Neither agree nor disagree	strongly disagree	strongly disagree	Neither agree nor disagree	strongly agree	yes	1	4	no	2	20	yes	3	20	no	no	no	no	no
Agree	Disagree	Agree	Agree	Agree	Agree	Agree	Agree	Agree	agree	strongly agree	agree	Neither agree nor disagree	agree	agree	disagree	disagree	strongly agree	strongly agree	yes	3	57	no	3	40	yes	2	44	yes	no	yes	no	no
Agree	Agree	Netural	Agree	Agree	Agree	Agree	Agree	Agree	Neither agree nor disagree	Neither agree nor disagree	Neither agree nor disagree	disagree	agree	agree	disagree	disagree	strongly agree	strongly agree	yes	6	60	no	3	39	yes	2	30	no	no	no	no	no
Agree	Netural	Netural	Netural	Netural	Agree	Agree	Agree	Netural	agree	strongly agree	Neither agree nor disagree	Neither agree nor disagree	strongly agree	disagree	strongly disagree	Neither agree nor disagree	agree	strongly agree	no	5	90	yes	6	90	yes	5	120	yes	yes	yes	yes	no
Agree	Disagree	Netural	Agree	Agree	Agree	Agree	Agree	Agree	strongly agree	agree	disagree	agree	agree	strongly agree	strongly disagree	strongly disagree	strongly agree	strongly agree	yes	5	120	yes	3	120	yes	3	120	yes	no	yes	yes	no
Agree	Netural	Netural	Netural	Agree	Agree	Netural	Agree	Netural	disagree	disagree	Neither agree nor disagree	Neither agree nor disagree	agree	agree	strongly agree	Neither agree nor disagree	Neither agree nor disagree	agree	yes	7	30	yes	5	54	yes	3	30	no	yes	no	yes	no
Agree	Netural	Agree	Agree	Agree	Agree	Agree	Agree	Netural	agree	disagree	Neither agree nor disagree	strongly disagree	strongly agree	strongly agree	strongly disagree	strongly disagree	agree	strongly agree	yes	3	3	no	4	2	yes	2	30	yes	yes	no	yes	no
Agree	Netural	Netural	Netural	Netural	Netural	Netural	Netural	Netural	Neither agree nor disagree	agree	Neither agree nor disagree	Neither agree nor disagree	Neither agree nor disagree	disagree	Neither agree nor disagree	Neither agree nor disagree	agree	agree	yes	7	57	no	3	60	yes	2	120	no	no	no	yes	yes
Agree	Disagree	Netural	Netural	Agree	Agree	Agree	Agree	Agree	strongly agree	strongly disagree	agree	Neither agree nor disagree	Neither agree nor disagree	strongly agree	strongly disagree	Neither agree nor disagree	agree	strongly agree	yes	5	40	yes	2	60	yes	3	30	no	no	no	no	no
Agree	Disagree	Disagree	Agree	Agree	Agree	Agree	Agree	Agree	Neither agree nor disagree	strongly agree	disagree	strongly disagree	agree	Neither agree nor disagree	Neither agree nor disagree	disagree	strongly agree	strongly agree	yes	5	15	no	1	10	yes	2	30	no	no	no	yes	yes
Agree	Disagree	Netural	Agree	Agree	Agree	Agree	Agree	Agree	disagree	disagree	strongly disagree	strongly disagree	Neither agree nor disagree	Neither agree nor disagree	strongly disagree	strongly disagree	strongly agree	agree	yes	4	60	no	1	60	yes	2	30	yes	no	no	yes	no
Agree	Disagree	Netural	Agree	Disagree	Agree	Agree	Agree	Agree	disagree	disagree	strongly disagree	disagree	strongly agree	strongly agree	strongly disagree	strongly disagree	strongly agree	strongly agree	yes	4	70	yes	2	100	yes	3	65	yes	yes	no	yes	yes
Agree	Netural	Agree	Agree	Agree	Agree	Agree	Agree	Agree	strongly agree	disagree	Neither agree nor disagree	agree	Neither agree nor disagree	Neither agree nor disagree	Neither agree nor disagree	strongly disagree	agree	strongly agree	yes	3	300	yes	2	20	yes	2	40	yes	yes	yes	yes	yes
Agree	Disagree	Agree	Agree	Agree	Agree	Agree	Agree	Agree	disagree	disagree	disagree	disagree	Neither agree nor disagree	Neither agree nor disagree	disagree	disagree	disagree	disagree	yes	1	15	no	0	0	yes	3	15	no	no	no	no	no
Netural	Netural	Netural	Agree	Netural	Agree	Netural	Netural	Netural	Neither agree nor disagree	agree	Neither agree nor disagree	agree	Neither agree nor disagree	Neither agree nor disagree	Neither agree nor disagree	agree	agree	agree	yes	1	2	no	0	1	no	1	1	no	no	yes	no	no
Agree	Disagree	Netural	Netural	Agree	Agree	Agree	Agree	Agree	agree	disagree	disagree	strongly disagree	strongly agree	strongly agree	strongly disagree	strongly disagree	strongly agree	strongly agree	yes	4	30	yes	2	50	yes	3	60	no	no	yes	no	no
Agree	Disagree	Netural	Agree	Agree	Agree	Agree	Agree	Agree	agree	disagree	strongly disagree	strongly disagree	strongly agree	strongly agree	Neither agree nor disagree	disagree	strongly agree	strongly agree	yes	5	45	yes	4	15	yes	4	40	no	no	yes	no	no
Agree	Disagree	Disagree	Agree	Agree	Agree	Agree	Agree	Agree	Neither agree nor disagree	strongly disagree	strongly disagree	strongly disagree	agree	strongly disagree	strongly disagree	strongly disagree	strongly agree	strongly agree	yes	7	120	yes	4	30	yes	4	30	yes	yes	no	yes	no
Agree	Disagree	Netural	Agree	Agree	Agree	Agree	Netural	Netural	agree	Neither agree nor disagree	Neither agree nor disagree	Neither agree nor disagree	Neither agree nor disagree	Neither agree nor disagree	agree	agree	agree	agree	yes	3	25	no	0	0	yes	4	25	no	no	no	no	no
Agree	Agree	Netural	Agree	Agree	Agree	Netural	Agree	Netural	disagree	disagree	Neither agree nor disagree	Neither agree nor disagree	Neither agree nor disagree	Neither agree nor disagree	Neither agree nor disagree	Neither agree nor disagree	agree	agree	yes	7	1	no	1	30	yes	1	45	yes	yes	yes	no	no
Agree	Agree	Netural	Agree	Agree	Agree	Agree	Agree	Agree	agree	strongly disagree	strongly agree	Neither agree nor disagree	agree	strongly agree	strongly agree	strongly disagree	strongly agree	strongly agree	yes	3	1	yes	3	60	yes	3	60	no	no	no	no	no
Agree	Agree	Netural	Netural	Agree	Agree	Agree	Netural	Agree	strongly agree	agree	Neither agree nor disagree	Neither agree nor disagree	Neither agree nor disagree	Neither agree nor disagree	agree	Neither agree nor disagree	Neither agree nor disagree	strongly agree	yes	5	57	yes	5	40	yes	4	44	yes	yes	yes	yes	no
Netural	Netural	Netural	Netural	Netural	Netural	Netural	Netural	Netural	Neither agree nor disagree	disagree	Neither agree nor disagree	Neither agree nor disagree	Neither agree nor disagree	Neither agree nor disagree	Neither agree nor disagree	Neither agree nor disagree	Neither agree nor disagree	Neither agree nor disagree	yes	1	0	yes	2	40	no	0	0	yes	yes	no	yes	yes
Agree	Netural	Agree	Agree	Agree	Agree	Netural	Agree	Agree	Neither agree nor disagree	disagree	agree	Neither agree nor disagree	Neither agree nor disagree	agree	Neither agree nor disagree	agree	agree	agree	no	2	10	no	0	0	yes	2	20	yes	yes	yes	yes	no
Agree	Agree	Netural	Netural	Disagree	Netural	Netural	Agree	Agree	agree	agree	disagree	disagree	agree	agree	disagree	Neither agree nor disagree	agree	agree	yes	6	480	no	0	0	no	0	0	no	no	yes	no	yes
Agree	Netural	Netural	Agree	Agree	Agree	Agree	Agree	Agree	Neither agree nor disagree	disagree	Neither agree nor disagree	disagree	agree	Neither agree nor disagree	disagree	disagree	agree	agree	no	2	60	no	2	1	no	1	1	no	no	no	no	no
Agree	Netural	Agree	Netural	Agree	Agree	Agree	Netural	Agree	agree	Neither agree nor disagree	Neither agree nor disagree	disagree	agree	agree	Neither agree nor disagree	Neither agree nor disagree	strongly agree	strongly agree	yes	5	20	yes	2	30	yes	4	30	yes	yes	yes	yes	yes
Agree	Disagree	Netural	Agree	Agree	Agree	Netural	Agree	Agree	agree	strongly agree	Neither agree nor disagree	Neither agree nor disagree	disagree	Neither agree nor disagree	strongly disagree	Neither agree nor disagree	strongly agree	agree	no	3	7	no	2	3	no	0	0	yes	no	no	yes	no
Agree	Disagree	Disagree	Netural	Disagree	Agree	Netural	Agree	Agree	Neither agree nor disagree	strongly disagree	strongly disagree	disagree	strongly agree	strongly agree	strongly disagree	disagree	agree	Neither agree nor disagree	no	3	5	yes	7	15	no	5	3	no	no	no	no	no
Netural	Disagree	Netural	Agree	Netural	Agree	Agree	Agree	Netural	disagree	agree	agree	Neither agree nor disagree	strongly disagree	strongly disagree	strongly disagree	strongly disagree	strongly agree	agree	no	1	5	no	0	0	no	0	0	yes	yes	yes	no	no
Agree	Disagree	Agree	Agree	Agree	Agree	Agree	Agree	Agree	Neither agree nor disagree	disagree	strongly disagree	disagree	Neither agree nor disagree	agree	Neither agree nor disagree	disagree	agree	strongly agree	yes	2	20	yes	2	45	yes	2	30	no	yes	yes	yes	yes
Agree	Disagree	Agree	Agree	Agree	Agree	Agree	Agree	Agree	agree	Neither agree nor disagree	agree	agree	Neither agree nor disagree	agree	strongly agree	strongly agree	agree	agree	yes	2	10	yes	2	10	no	1	10	yes	yes	yes	yes	yes
Agree	Agree	Netural	Netural	Netural	Netural	Netural	Agree	Netural	agree	strongly agree	agree	disagree	agree	agree	Neither agree nor disagree	disagree	strongly agree	agree	yes	2	10	yes	2	15	no	0	0	no	no	yes	no	no
Agree	Netural	Netural	Agree	Disagree	Agree	Agree	Agree	Agree	Neither agree nor disagree	agree	agree	Neither agree nor disagree	Neither agree nor disagree	disagree	agree	agree	strongly agree	strongly agree	yes	3	60	no	1	30	yes	3	30	yes	yes	yes	yes	no
Agree	Disagree	Agree	Agree	Agree	Agree	Agree	Netural	Agree	Neither agree nor disagree	agree	agree	disagree	Neither agree nor disagree	Neither agree nor disagree	agree	agree	agree	agree	no	3	6	yes	1	30	yes	2	30	yes	yes	yes	yes	yes
Netural	Disagree	Netural	Netural	Agree	Agree	Netural	Netural	Netural	agree	strongly agree	Neither agree nor disagree	strongly agree	Neither agree nor disagree	agree	strongly agree	Neither agree nor disagree	agree	agree	no	3	2	yes	3	10	yes	3	15	yes	yes	yes	yes	yes
Agree	Agree	Netural	Agree	Agree	Agree	Agree	Agree	Netural	agree	disagree	Neither agree nor disagree	strongly agree	agree	agree	Neither agree nor disagree	disagree	agree	strongly agree	no	1	10	yes	4	30	yes	2	15	yes	yes	no	yes	yes
Agree	Agree	Agree	Agree	Agree	Agree	Agree	Agree	Agree	agree	agree	agree	agree	agree	agree	agree	agree	agree	agree	yes	3	30	yes	3	60	yes	2	60	no	no	no	yes	yes
Agree	Disagree	Netural	Agree	Agree	Agree	Agree	Agree	Agree	disagree	Neither agree nor disagree	strongly disagree	strongly disagree	strongly agree	strongly agree	Neither agree nor disagree	strongly disagree	strongly agree	strongly agree	yes	2	60	no	7	60	yes	7	60	yes	yes	yes	yes	no
Agree	Disagree	Agree	Agree	Agree	Agree	Netural	Agree	Agree	agree	Neither agree nor disagree	disagree	disagree	strongly agree	agree	Neither agree nor disagree	disagree	agree	strongly agree	yes	2	360	yes	2	90	yes	2	40	yes	yes	no	yes	no
Agree	Disagree	Netural	Agree	Agree	Agree	Agree	Agree	Agree	agree	Neither agree nor disagree	disagree	disagree	strongly agree	strongly agree	strongly disagree	Neither agree nor disagree	strongly agree	strongly agree	yes	4	60	yes	2	60	yes	2	120	yes	yes	yes	yes	yes
Netural	Netural	Netural	Agree	Agree	Agree	Agree	Netural	Agree	Neither agree nor disagree	agree	Neither agree nor disagree	disagree	agree	Neither agree nor disagree	agree	Neither agree nor disagree	strongly agree	strongly agree	yes	1	57	yes	4	30	yes	4	30	yes	yes	yes	yes	no
Agree	Disagree	Agree	Agree	Agree	Disagree	Netural	Netural	Agree	Neither agree nor disagree	disagree	Neither agree nor disagree	strongly disagree	agree	Neither agree nor disagree	disagree	disagree	strongly agree	strongly agree	yes	2	60	yes	2	30	yes	1	30	no	no	yes	no	no
Agree	Disagree	Disagree	Agree	Netural	Agree	Agree	Agree	Agree	Neither agree nor disagree	strongly agree	agree	disagree	agree	Neither agree nor disagree	agree	agree	agree	agree	no	0	30	no	0	30	no	0	0	no	no	no	yes	yes
Netural	Netural	Netural	Netural	Netural	Netural	Netural	Netural	Netural	Neither agree nor disagree	Neither agree nor disagree	Neither agree nor disagree	Neither agree nor disagree	Neither agree nor disagree	Neither agree nor disagree	Neither agree nor disagree	Neither agree nor disagree	Neither agree nor disagree	Neither agree nor disagree	yes	5	10	yes	2	20	yes	1	60	no	no	no	no	no
Agree	Netural	Agree	Netural	Agree	Agree	Agree	Agree	Agree	agree	Neither agree nor disagree	strongly disagree	disagree	agree	agree	disagree	disagree	agree	agree	yes	5	30	no	2	60	yes	4	60	yes	yes	yes	yes	yes
Agree	Disagree	Agree	Agree	Agree	Netural	Agree	Agree	Disagree	Neither agree nor disagree	agree	agree	agree	strongly agree	disagree	Neither agree nor disagree	strongly agree	strongly agree	strongly agree	yes	2	57	no	0	0	no	0	0	yes	no	yes	yes	no
Agree	Disagree	Netural	Agree	Agree	Agree	Agree	Agree	Agree	Neither agree nor disagree	disagree	Neither agree nor disagree	agree	agree	agree	Neither agree nor disagree	Neither agree nor disagree	agree	strongly agree	yes	5	57	yes	3	40	yes	3	44	yes	yes	yes	yes	no
Agree	Agree	Agree	Agree	Agree	Agree	Agree	Agree	Agree	Neither agree nor disagree	strongly disagree	strongly disagree	strongly disagree	strongly agree	strongly agree	Neither agree nor disagree	strongly disagree	strongly agree	strongly agree	yes	6	20	yes	4	40	yes	2	40	no	no	no	no	no
Agree	Disagree	Netural	Agree	Agree	Agree	Agree	Agree	Agree	Neither agree nor disagree	disagree	disagree	disagree	agree	Neither agree nor disagree	disagree	Neither agree nor disagree	strongly agree	strongly agree	yes	3	15	yes	1	10	yes	2	30	no	no	no	no	no
Agree	Disagree	Agree	Netural	Netural	Agree	Agree	Agree	Agree	agree	Neither agree nor disagree	Neither agree nor disagree	Neither agree nor disagree	agree	Neither agree nor disagree	Neither agree nor disagree	Neither agree nor disagree	agree	agree	yes	5	30	no	1	20	yes	5	20	no	no	yes	no	no
Agree	Disagree	Agree	Agree	Agree	Agree	Netural	Agree	Agree	agree	strongly agree	disagree	strongly disagree	agree	strongly agree	strongly agree	Neither agree nor disagree	strongly agree	strongly agree	yes	3	90	yes	2	90	yes	4	120	yes	yes	yes	yes	yes
Agree	Netural	Netural	Agree	Agree	Agree	Agree	Agree	Agree	Neither agree nor disagree	Neither agree nor disagree	Neither agree nor disagree	Neither agree nor disagree	Neither agree nor disagree	Neither agree nor disagree	Neither agree nor disagree	Neither agree nor disagree	agree	agree	yes	3	30	no	2	30	yes	3	30	no	no	no	no	no
Agree	Disagree	Netural	Agree	Agree	Agree	Agree	Agree	Agree	disagree	agree	Neither agree nor disagree	Neither agree nor disagree	agree	Neither agree nor disagree	agree	Neither agree nor disagree	strongly agree	strongly agree	yes	3	4	no	0	40	no	0	44	yes	no	yes	yes	no
Agree	Disagree	Netural	Agree	Agree	Agree	Agree	Agree	Netural	Neither agree nor disagree	Neither agree nor disagree	agree	agree	Neither agree nor disagree	agree	disagree	disagree	strongly agree	agree	yes	3	15	yes	7	60	yes	3	30	yes	no	no	yes	yes
Netural	Disagree	Netural	Netural	Netural	Agree	Netural	Netural	Agree	Neither agree nor disagree	agree	Neither agree nor disagree	disagree	Neither agree nor disagree	Neither agree nor disagree	Neither agree nor disagree	Neither agree nor disagree	agree	strongly agree	yes	5	75	no	3	30	no	2	10	yes	no	no	yes	yes
Agree	Disagree	Netural	Agree	Agree	Agree	Agree	Agree	Agree	strongly agree	Neither agree nor disagree	strongly disagree	strongly disagree	strongly agree	strongly agree	strongly disagree	disagree	strongly agree	strongly agree	no	1	300	yes	2	60	yes	2	160	yes	no	yes	yes	yes
Agree	Disagree	Netural	Netural	Agree	Agree	Agree	Agree	Agree	Neither agree nor disagree	disagree	Neither agree nor disagree	agree	agree	Neither agree nor disagree	Neither agree nor disagree	disagree	agree	agree	yes	2	10	no	1	10	no	1	10	no	no	no	no	no
Agree	Disagree	Netural	Agree	Agree	Agree	Agree	Agree	Netural	Neither agree nor disagree	strongly disagree	strongly disagree	strongly disagree	strongly agree	strongly agree	strongly disagree	strongly disagree	strongly agree	strongly agree	yes	7	57	yes	5	180	yes	5	120	yes	no	yes	yes	yes
Agree	Disagree	Netural	Netural	Agree	Agree	Netural	Agree	Agree	Neither agree nor disagree	disagree	disagree	disagree	agree	agree	disagree	Neither agree nor disagree	strongly agree	strongly agree	yes	2	90	no	0	0	no	0	0	yes	yes	no	yes	no
Agree	Disagree	Netural	Agree	Agree	Agree	Agree	Agree	Agree	disagree	Neither agree nor disagree	strongly disagree	Neither agree nor disagree	Neither agree nor disagree	disagree	disagree	agree	strongly agree	strongly agree	no	4	5	no	2	25	yes	4	45	yes	no	yes	yes	no
Agree	Disagree	Agree	Netural	Agree	Agree	Agree	Agree	Agree	agree	disagree	strongly disagree	disagree	agree	strongly agree	agree	agree	strongly agree	agree	yes	5	45	no	0	0	no	0	0	yes	yes	no	yes	yes
Agree	Disagree	Netural	Agree	Agree	Agree	Agree	Agree	Agree	disagree	strongly disagree	strongly disagree	strongly disagree	strongly agree	strongly agree	strongly disagree	strongly disagree	strongly agree	strongly agree	yes	7	57	yes	7	7	yes	7	7	yes	yes	no	yes	yes
Netural	Disagree	Agree	Netural	Agree	Netural	Agree	Agree	Netural	disagree	Neither agree nor disagree	disagree	agree	disagree	disagree	strongly agree	agree	agree	strongly agree	yes	2	20	no	0	0	yes	3	20	yes	yes	no	yes	no
Agree	Netural	Disagree	Agree	Agree	Agree	Agree	Agree	Agree	agree	disagree	strongly disagree	disagree	Neither agree nor disagree	strongly agree	strongly disagree	strongly disagree	strongly agree	strongly agree	yes	3	120	yes	1	40	yes	2	44	no	no	no	yes	no
Agree	Disagree	Agree	Agree	Agree	Agree	Agree	Agree	Agree	agree	agree	disagree	disagree	agree	agree	disagree	disagree	strongly agree	strongly agree	yes	6	15	yes	3	120	yes	4	45	no	no	no	yes	yes
Agree	Disagree	Netural	Agree	Agree	Agree	Netural	Agree	Netural	disagree	agree	disagree	disagree	agree	disagree	strongly disagree	agree	strongly agree	agree	yes	1	3	yes	2	35	no	3	80	yes	yes	no	yes	yes
Agree	Disagree	Agree	Agree	Agree	Agree	Agree	Agree	Agree	strongly agree	strongly agree	Neither agree nor disagree	strongly agree	agree	agree	agree	Neither agree nor disagree	strongly agree	agree	yes	4	57	yes	3	40	yes	3	44	no	no	no	no	no
Agree	Agree	Netural	Agree	Agree	Agree	Agree	Agree	Agree	strongly agree	strongly disagree	Neither agree nor disagree	agree	strongly agree	strongly agree	strongly agree	disagree	strongly agree	strongly agree	yes	5	57	yes	3	240	yes	7	240	yes	yes	no	yes	yes
Agree	Disagree	Netural	Agree	Netural	Agree	Agree	Agree	Agree	agree	strongly disagree	disagree	strongly disagree	agree	agree	disagree	disagree	agree	agree	yes	7	30	yes	3	30	yes	3	45	yes	no	yes	yes	yes
Agree	Disagree	Disagree	Agree	Agree	Netural	Netural	Netural	Netural	Neither agree nor disagree	disagree	strongly disagree	disagree	agree	Neither agree nor disagree	strongly disagree	disagree	agree	agree	yes	5	57	no	4	40	no	3	44	yes	yes	yes	yes	yes
Agree	Disagree	Netural	Netural	Netural	Netural	Agree	Agree	Agree	Neither agree nor disagree	Neither agree nor disagree	Neither agree nor disagree	Neither agree nor disagree	Neither agree nor disagree	Neither agree nor disagree	Neither agree nor disagree	Neither agree nor disagree	Neither agree nor disagree	Neither agree nor disagree	yes	7	30	yes	7	15	yes	5	15	yes	no	yes	yes	yes
Agree	Disagree	Netural	Agree	Agree	Agree	Agree	Agree	Agree	agree	agree	strongly disagree	strongly disagree	agree	agree	strongly disagree	strongly disagree	strongly agree	strongly agree	yes	2	10	no	3	60	no	2	60	no	no	no	no	no
Agree	Disagree	Netural	Agree	Netural	Agree	Netural	Agree	Netural	Neither agree nor disagree	agree	disagree	disagree	agree	Neither agree nor disagree	strongly disagree	strongly disagree	strongly agree	strongly agree	yes	7	57	no	3	30	no	2	30	no	no	yes	no	no
Agree	Agree	Netural	Netural	Netural	Agree	Agree	Netural	Netural	Neither agree nor disagree	strongly agree	Neither agree nor disagree	Neither agree nor disagree	agree	agree	Neither agree nor disagree	Neither agree nor disagree	agree	strongly agree	yes	5	30	no	3	10	no	2	20	no	no	no	yes	yes
Agree	Disagree	Netural	Agree	Agree	Agree	Agree	Agree	Agree	Neither agree nor disagree	agree	Neither agree nor disagree	Neither agree nor disagree	Neither agree nor disagree	agree	disagree	agree	agree	strongly agree	yes	4	57	no	0	0	yes	2	60	yes	yes	yes	yes	yes
Agree	Disagree	Netural	Agree	Agree	Agree	Agree	Agree	Netural	disagree	Neither agree nor disagree	agree	Neither agree nor disagree	Neither agree nor disagree	strongly disagree	Neither agree nor disagree	Neither agree nor disagree	disagree	disagree	no	0	0	no	0	0	no	0	0	yes	no	yes	yes	yes
Agree	Disagree	Netural	Netural	Agree	Agree	Agree	Agree	Agree	agree	agree	strongly disagree	disagree	Neither agree nor disagree	Neither agree nor disagree	disagree	disagree	agree	strongly agree	no	2	20	no	0	0	yes	3	60	yes	no	yes	yes	no
Agree	Disagree	Netural	Agree	Agree	Agree	Netural	Agree	Agree	Neither agree nor disagree	strongly disagree	strongly disagree	disagree	agree	agree	strongly disagree	strongly disagree	strongly agree	strongly agree	yes	7	480	yes	5	30	yes	7	44	no	no	yes	no	no
Netural	Netural	Netural	Netural	Netural	Agree	Netural	Netural	Netural	Neither agree nor disagree	strongly agree	agree	agree	Neither agree nor disagree	Neither agree nor disagree	Neither agree nor disagree	agree	agree	strongly agree	yes	2	30	yes	1	0	no	0	0	yes	no	yes	yes	no
Disagree	Agree	Netural	Disagree	Disagree	Disagree	Disagree	Disagree	Disagree	strongly disagree	strongly disagree	strongly disagree	strongly disagree	Neither agree nor disagree	disagree	Neither agree nor disagree	Neither agree nor disagree	strongly agree	strongly agree	yes	7	69	yes	5	60	yes	3	69	yes	no	no	yes	no
Agree	Disagree	Netural	Agree	Agree	Netural	Netural	Netural	Netural	Neither agree nor disagree	strongly agree	agree	strongly disagree	strongly agree	Neither agree nor disagree	disagree	Neither agree nor disagree	strongly agree	strongly agree	yes	3	20	no	1	60	yes	2	30	no	no	no	yes	yes
Agree	Agree	Agree	Agree	Agree	Agree	Agree	Agree	Agree	disagree	disagree	strongly disagree	strongly disagree	strongly agree	strongly agree	strongly disagree	strongly disagree	strongly agree	strongly agree	yes	7	20	yes	7	7	yes	7	7	yes	yes	yes	yes	no
Agree	Netural	Netural	Agree	Netural	Agree	Netural	Agree	Agree	Neither agree nor disagree	Neither agree nor disagree	Neither agree nor disagree	agree	disagree	Neither agree nor disagree	agree	Neither agree nor disagree	strongly agree	agree	yes	1	30	no	0	0	yes	1	1	yes	no	yes	yes	no
Agree	Disagree	Agree	Agree	Agree	Agree	Agree	Agree	Agree	strongly agree	strongly agree	agree	Neither agree nor disagree	disagree	disagree	Neither agree nor disagree	Neither agree nor disagree	Neither agree nor disagree	disagree	no	2	40	yes	3	30	yes	3	30	yes	no	no	yes	no
Agree	Disagree	Netural	Agree	Agree	Agree	Agree	Agree	Agree	disagree	disagree	disagree	strongly disagree	agree	agree	disagree	disagree	strongly agree	strongly agree	yes	7	120	yes	4	120	yes	6	120	yes	yes	no	yes	yes
Agree	Disagree	Netural	Agree	Agree	Agree	Netural	Agree	Agree	Neither agree nor disagree	agree	Neither agree nor disagree	disagree	Neither agree nor disagree	disagree	Neither agree nor disagree	agree	Neither agree nor disagree	agree	yes	3	30	no	2	30	yes	2	30	yes	no	yes	yes	yes
Agree	Disagree	Netural	Agree	Agree	Agree	Agree	Agree	Agree	disagree	strongly disagree	disagree	strongly agree	strongly agree	agree	strongly disagree	disagree	strongly agree	strongly agree	yes	7	60	yes	5	60	yes	7	60	yes	no	yes	no	no
Agree	Disagree	Disagree	Agree	Agree	Agree	Agree	Agree	Agree	Neither agree nor disagree	disagree	strongly disagree	strongly disagree	strongly agree	agree	strongly disagree	disagree	strongly agree	strongly agree	yes	7	57	yes	2	60	yes	3	60	no	no	no	yes	yes
Netural	Disagree	Netural	Netural	Netural	Netural	Netural	Netural	Netural	Neither agree nor disagree	Neither agree nor disagree	Neither agree nor disagree	disagree	disagree	disagree	disagree	agree	Neither agree nor disagree	Neither agree nor disagree	yes	3	3	no	2	20	yes	3	20	no	no	yes	no	no
Agree	Disagree	Netural	Agree	Netural	Agree	Agree	Agree	Agree	Neither agree nor disagree	agree	disagree	strongly disagree	agree	strongly agree	strongly disagree	disagree	strongly agree	strongly agree	yes	3	30	yes	2	15	no	3	0	yes	no	no	no	no
Agree	Netural	Disagree	Agree	Disagree	Agree	Agree	Agree	Agree	disagree	agree	Neither agree nor disagree	strongly disagree	agree	disagree	agree	agree	strongly agree	strongly agree	yes	3	57	yes	2	40	no	0	0	yes	no	no	yes	yes
Agree	Disagree	Disagree	Netural	Agree	Agree	Agree	Agree	Agree	disagree	strongly disagree	Neither agree nor disagree	disagree	disagree	Neither agree nor disagree	disagree	Neither agree nor disagree	strongly agree	strongly agree	yes	5	20	no	0	0	no	1	30	yes	yes	yes	yes	yes
Agree	Disagree	Netural	Agree	Agree	Agree	Agree	Agree	Agree	disagree	strongly agree	Neither agree nor disagree	agree	agree	Neither agree nor disagree	disagree	strongly agree	strongly agree	strongly agree	no	4	57	no	1	40	yes	2	44	yes	yes	yes	yes	yes
Agree	Agree	Netural	Agree	Agree	Netural	Agree	Agree	Netural	strongly disagree	strongly agree	disagree	Neither agree nor disagree	Neither agree nor disagree	agree	disagree	agree	strongly agree	strongly agree	yes	2	30	yes	1	30	yes	3	44	yes	no	no	yes	no
Agree	Disagree	Netural	Agree	Agree	Agree	Agree	Agree	Netural	agree	disagree	disagree	agree	strongly agree	strongly agree	strongly disagree	disagree	strongly agree	strongly agree	yes	7	10	yes	4	10	yes	4	10	no	yes	yes	yes	yes
Agree	Disagree	Netural	Agree	Disagree	Agree	Agree	Agree	Agree	Neither agree nor disagree	strongly agree	strongly agree	strongly disagree	strongly agree	agree	disagree	strongly disagree	strongly agree	strongly agree	yes	3	90	yes	2	60	yes	2	150	yes	yes	yes	yes	yes
Netural	Netural	Netural	Netural	Agree	Agree	Netural	Netural	Netural	agree	strongly agree	agree	strongly agree	agree	agree	Neither agree nor disagree	Neither agree nor disagree	agree	agree	no	4	57	no	2	40	no	3	44	no	no	no	no	no
